# Supplementary material for: Frequency control and monitoring of the ALOMAR RMR lidar's pulsed high-power Nd:YAG lasers
Source: Copernicus journal article supplement (doi:10.5194/egusphere-2025-1995), 2025-06-23
Supplement: Supplementary file [file egusphere-2025-1995-AC3-supplement.pdf]

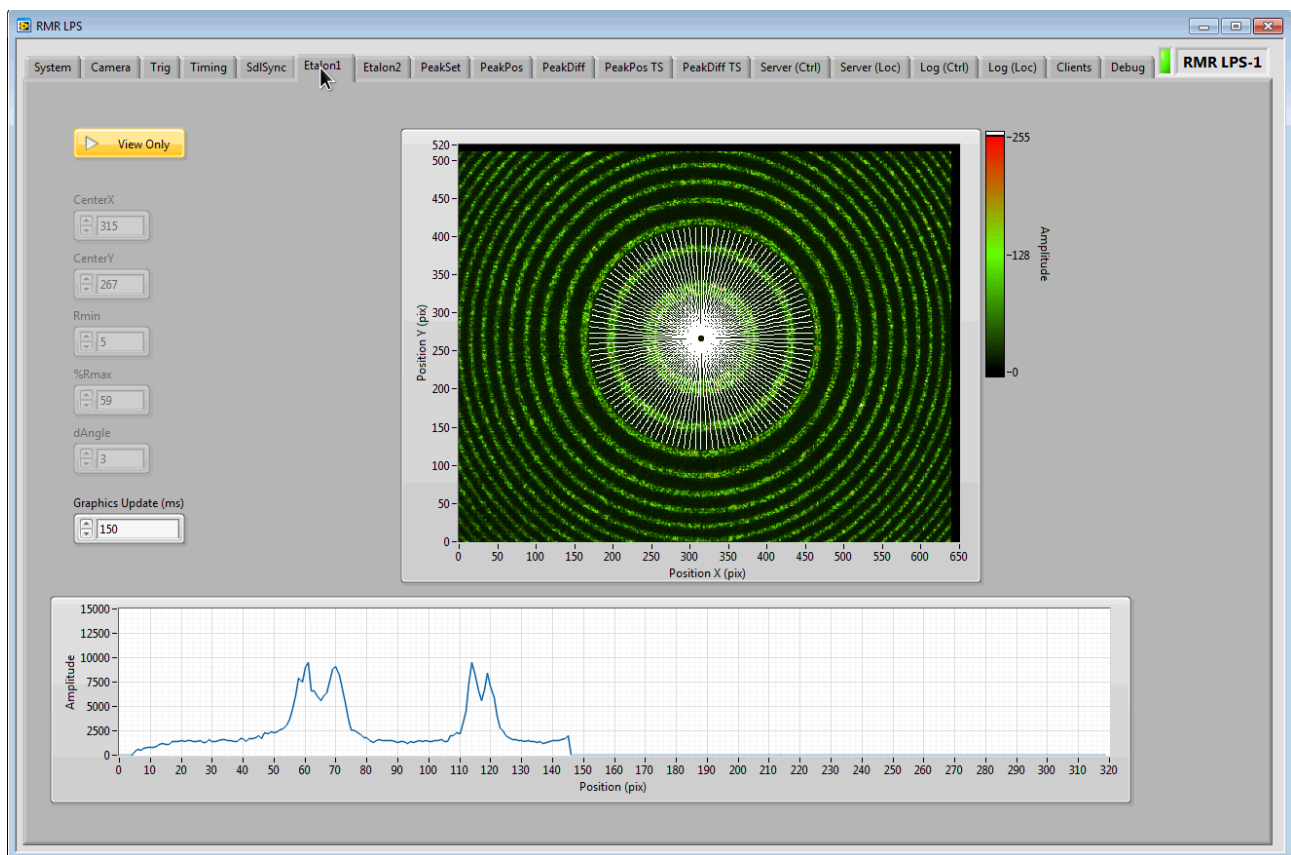

Fig. 1: Screenshot of the LPS client user interface taken by chance when the power laser was not working single-mode.

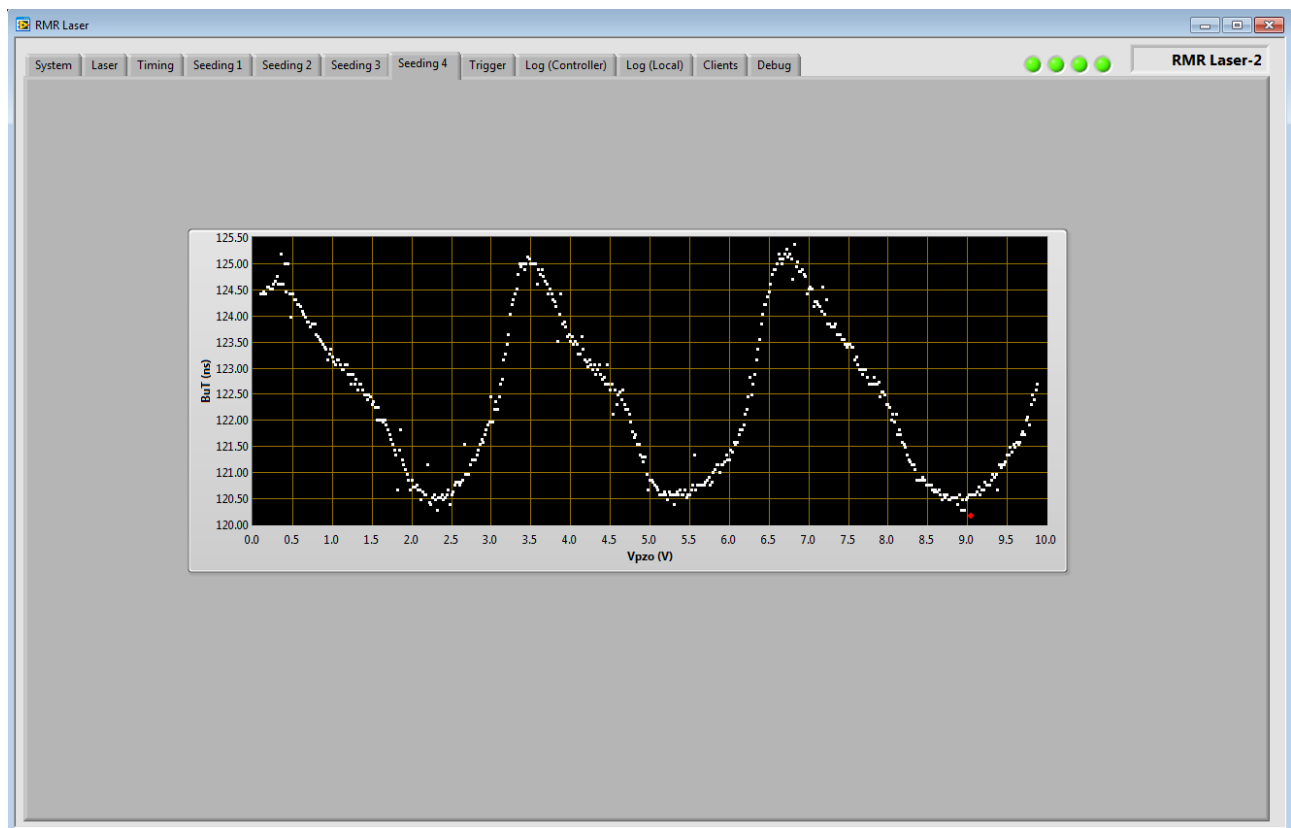

Fig. 2: Scan of the piezo over several resonance conditions of the power laser cavity (pulse build-up time as function of piezo position in terms of control voltage).

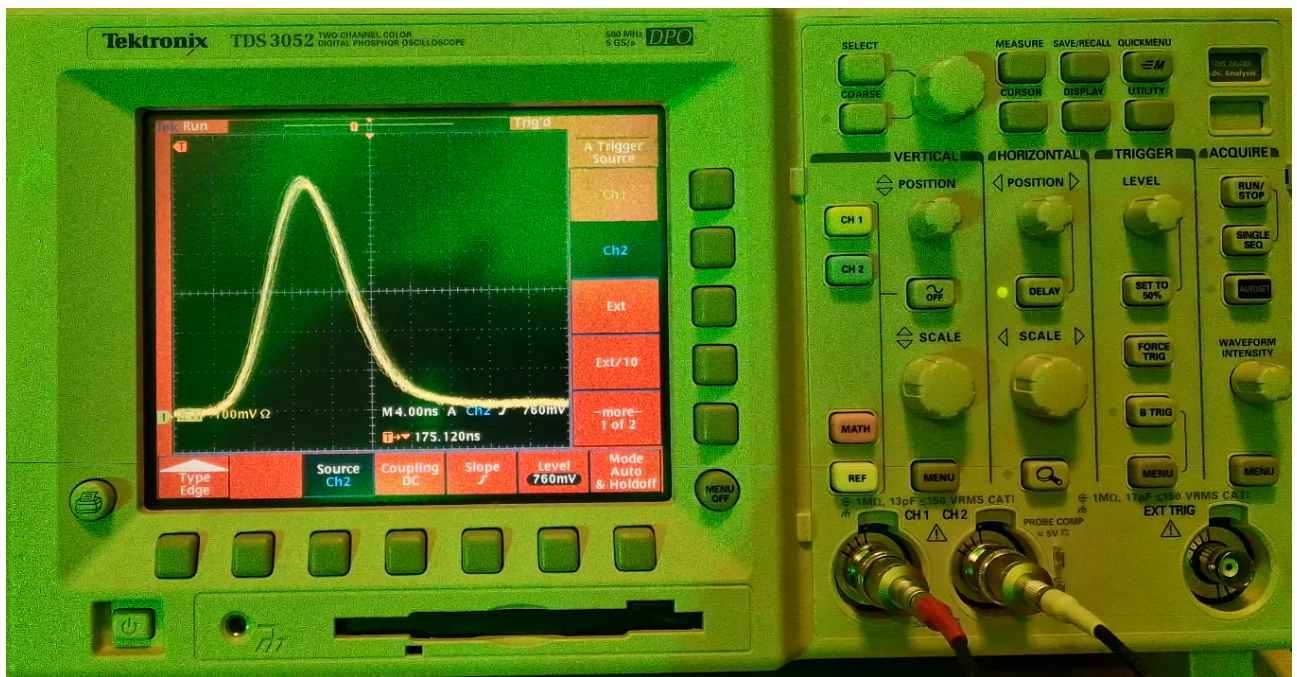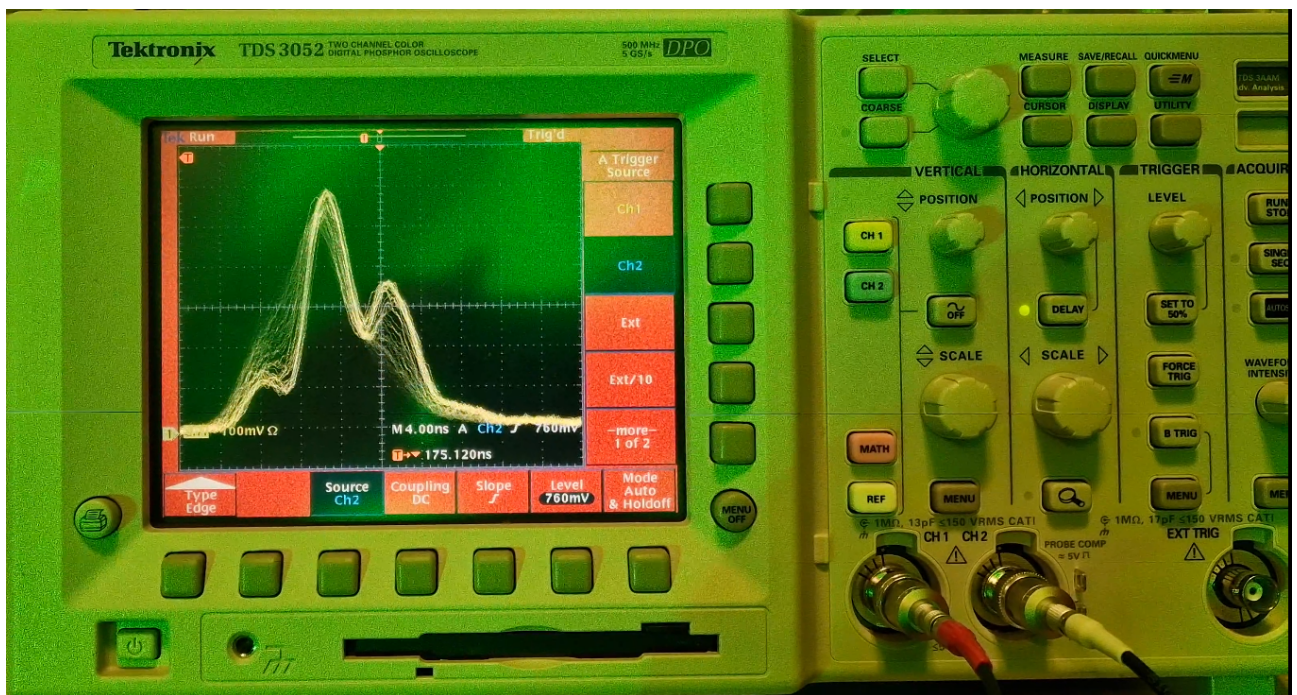

Fig. 3: Temporal courses of the laser pulse during the piezo scan near (top) and outside (bottom) a resonance condition.
